# Supplementary material for: Aminolysis of 4-nitrophenyl phenyl carbonate and thionocarbonate: effects of amine nature and modification of electrophilic center from CO to CS on reactivity and mechanism
Source: Royal Society of Chemistry journal article supplement (doi:10.1039/b801422a), 2008-01-01
Supplement: b801422a.pdf [file b801422a.pdf]

### Electronic Supplementary Information

Aminolysis of 4-nitrophenyl phenyl carbonate and thionocarbonate: Effects of amine nature and modification of electrophilic center from C=O to C=S on reactivity and mechanism

Ik-Hwan Um,<sup>\*</sup> Sora Yoon, Hye-Ran Park<sup>†</sup> and Hyun-Joo Han<sup>‡</sup>

Division of Nano Sciences and Department of Chemistry, Ewha Womans University, Seoul  
120-750, Korea

Tel: 82-2-3277-2349; Fax: 82-2-3277-2844; E-mail; [ihum@ewha.ac.kr](mailto:ihum@ewha.ac.kr)

<sup>†</sup>Present address: Hansolchemical, Wanju-Kun, Chonlabuk-do 565-900, Korea

<sup>‡</sup>Present address: Advanced PKG Development Central R & D Institute, Samsung Electro-Mechanics, Suwon, Gyunggi-do 443-743, Korea

## Table of Contents

- (1) Tables S1 – S14. Summary of kinetic results for reactions of 4-nitrophenyl phenyl carbonate (**5**) and thionocarbonate (**6**) with alicyclic secondary amines in 80 mol % H<sub>2</sub>O/20 mol % DMSO at 25.0 ± 0.1 °C.----- (S3-S9)
- (2) Fig. S1 – S7. Plots of  $k_{\text{obsd}}$  vs. [amine] for reactions of 4-nitrophenyl phenyl carbonate (**5**) and thionocarbonate (**6**) with alicyclic secondary amines in 80 mol % H<sub>2</sub>O/20 mol % DMSO at 25.0 ± 0.1 °C.----- (S10-S13)
- (3) Fig. S8 and S9. Plots of  $k_{\text{obsd}}/[\text{amine}]$  vs. [amine] and  $[\text{amine}]/k_{\text{obsd}}$  vs. 1/[amine] for reactions of 4-nitrophenyl phenyl thionocarbonate (**6**) with 1-formylpiperazine in 80 mol % H<sub>2</sub>O/20 mol % DMSO at 25.0 ± 0.1 °C.----- (S14)
- (4) Equations to determine the  $k_2/k_{-1}$  ratios (eqns S1 –S6)----- (S15)

Table S1 Kinetic data for the reaction of 4-nitrophenyl phenyl carbonate (**5**) with piperazinium ion in 80 mol % H<sub>2</sub>O/20 mol % DMSO at 25.0 ± 0.1 °C.

|   | [R <sub>2</sub> NH] / 10 <sup>-3</sup> M | <i>k</i> <sub>obsd</sub> / 10 <sup>-4</sup> s <sup>-1</sup> |
|---|------------------------------------------|-------------------------------------------------------------|
| 1 | 17.3                                     | 9.32                                                        |
| 2 | 31.7                                     | 17.8                                                        |
| 3 | 44.0                                     | 25.1                                                        |
| 4 | 54.4                                     | 32.0                                                        |
| 5 | 63.5                                     | 38.1                                                        |

$$k_N = (6.22 \pm 0.11) \times 10^{-2} \text{ M}^{-1}\text{s}^{-1}$$

$$\text{intercept} = (-1.76 \pm 0.52) \times 10^{-4} \text{ s}^{-1}$$

$$R^2 = 0.9995$$

Table S2 Kinetic data for the reaction of 4-nitrophenyl phenyl carbonate (**5**) with 1-formylpiperazine in 80 mol % H<sub>2</sub>O/20 mol % DMSO at 25.0 ± 0.1 °C.

|   | [R <sub>2</sub> NH] / 10 <sup>-3</sup> M | <i>k</i> <sub>obsd</sub> / 10 <sup>-3</sup> s <sup>-1</sup> |
|---|------------------------------------------|-------------------------------------------------------------|
| 1 | 10.6                                     | 17.9                                                        |
| 2 | 20.3                                     | 33.5                                                        |
| 3 | 29.2                                     | 48.4                                                        |
| 4 | 47.0                                     | 78.1                                                        |
| 5 | 55.9                                     | 93.9                                                        |

$$k_N = 1.68 \pm 0.01 \text{ M}^{-1}\text{s}^{-1}$$

$$\text{intercept} = (-2.91 \pm 4.71) \times 10^{-4} \text{ s}^{-1}$$

$$R^2 = 0.9999$$

Table S3 Kinetic data for the reaction of 4-nitrophenyl phenyl carbonate (**5**) with morpholine in 80 mol % H<sub>2</sub>O/20 mol % DMSO at 25.0 ± 0.1 °C.

|   | [R <sub>2</sub> NH] / 10 <sup>-3</sup> M | <i>k</i> <sub>obsd</sub> / 10 <sup>-2</sup> s <sup>-1</sup> |
|---|------------------------------------------|-------------------------------------------------------------|
| 1 | 10.8                                     | 12.3                                                        |
| 2 | 21.6                                     | 24.0                                                        |
| 3 | 32.4                                     | 36.5                                                        |
| 4 | 43.2                                     | 48.5                                                        |
| 5 | 54.0                                     | 61.0                                                        |

$$k_N = 11.3 \pm 0.1 \text{ M}^{-1}\text{s}^{-1}$$

$$\text{intercept} = (-0.11 \pm 0.25) \times 10^{-2} \text{ s}^{-1}$$

$$R^2 = 0.9999$$

Table S4 Kinetic data for the reaction of 4-nitrophenyl phenyl carbonate (**5**) with 1-(2-hydroxyethyl)piperazine in 80 mol % H<sub>2</sub>O/20 mol % DMSO at 25.0 ± 0.1 °C.

|   | [R <sub>2</sub> NH] / 10 <sup>-3</sup> M | <i>k</i> <sub>obsd</sub> / 10 <sup>-1</sup> s <sup>-1</sup> |
|---|------------------------------------------|-------------------------------------------------------------|
| 1 | 11.0                                     | 2.89                                                        |
| 2 | 22.0                                     | 5.77                                                        |
| 3 | 33.0                                     | 8.75                                                        |
| 4 | 44.0                                     | 11.7                                                        |
| 5 | 55.0                                     | 15.1                                                        |

$$k_N = 27.6 \pm 0.5 \text{ M}^{-1}\text{s}^{-1}$$

$$\text{intercept} = (-2.63 \pm 1.82) \times 10^{-2} \text{ s}^{-1}$$

$$R^2 = 0.9995$$

Table S5 Kinetic data for the reaction of 4-nitrophenyl phenyl carbonate (**5**) with piperazine in 80 mol % H<sub>2</sub>O/20 mol % DMSO at 25.0 ± 0.1 °C.

|   | [R <sub>2</sub> NH] / 10 <sup>-3</sup> M | <i>k</i> <sub>obsd</sub> / 10 <sup>-1</sup> s <sup>-1</sup> |
|---|------------------------------------------|-------------------------------------------------------------|
| 1 | 11.0                                     | 11.2                                                        |
| 2 | 21.9                                     | 22.7                                                        |
| 3 | 32.9                                     | 34.7                                                        |
| 4 | 43.8                                     | 45.7                                                        |
| 5 | 54.8                                     | 58.8                                                        |

$$k_N = 108 \pm 2 \text{ M}^{-1}\text{s}^{-1}$$

$$\text{intercept} = (-8.73 \pm 5.48) \times 10^{-2} \text{ s}^{-1}$$

$$R^2 = 0.9997$$

Table S6 Kinetic data for the reaction of 4-nitrophenyl phenyl carbonate (**5**) with 3-methylpiperidine in 80 mol % H<sub>2</sub>O/20 mol % DMSO at 25.0 ± 0.1 °C.

|   | [R <sub>2</sub> NH] / 10 <sup>-3</sup> M | <i>k</i> <sub>obsd</sub> / s <sup>-1</sup> |
|---|------------------------------------------|--------------------------------------------|
| 1 | 10.5                                     | 2.38                                       |
| 2 | 20.9                                     | 4.91                                       |
| 3 | 31.4                                     | 7.43                                       |
| 4 | 41.8                                     | 10.0                                       |
| 5 | 52.3                                     | 12.8                                       |

$$k_N = 248 \pm 3 \text{ M}^{-1}\text{s}^{-1}$$

$$\text{intercept} = (-2.83 \pm 1.02) \times 10^{-1} \text{ s}^{-1}$$

$$R^2 = 0.9997$$

Table S7 Kinetic data for the reaction of 4-nitrophenyl phenyl carbonate (**5**) with piperidine in 80 mol % H<sub>2</sub>O/20 mol % DMSO at 25.0 ± 0.1 °C.

|   | [R <sub>2</sub> NH] / 10 <sup>-3</sup> M | <i>k</i> <sub>obsd</sub> / s <sup>-1</sup> |
|---|------------------------------------------|--------------------------------------------|
| 1 | 10.9                                     | 2.98                                       |
| 2 | 21.8                                     | 5.99                                       |
| 3 | 32.7                                     | 9.24                                       |
| 4 | 43.6                                     | 12.4                                       |
| 5 | 54.5                                     | 15.7                                       |

$$k_{\text{app}} = 292 \pm 3 \text{ M}^{-1}\text{s}^{-1}$$

$$\text{intercept} = (-2.9 \pm 0.9) \times 10^{-1} \text{ s}^{-1}$$

$$R^2 = 0.9998$$

Table S8 Kinetic data for the reaction of 4-nitrophenyl phenyl thionocarbonate (**6**) with piperazinium ion in 80 mol % H<sub>2</sub>O/20 mol % DMSO at 25.0 ± 0.1 °C.

|   | [R <sub>2</sub> NH] / 10 <sup>-3</sup> M | <i>k</i> <sub>obsd</sub> / 10 <sup>-3</sup> s <sup>-1</sup> |
|---|------------------------------------------|-------------------------------------------------------------|
| 1 | 9.07                                     | 1.22                                                        |
| 2 | 17.3                                     | 2.74                                                        |
| 3 | 31.8                                     | 6.37                                                        |
| 4 | 44.8                                     | 11.0                                                        |
| 5 | 54.5                                     | 15.6                                                        |
| 6 | 63.6                                     | 19.9                                                        |
| 7 | 76.3                                     | 27.9                                                        |

Table S9 Kinetic data for the reaction of 4-nitrophenyl phenyl thionocarbonate (**6**) with 1-formylpiperazine in 80 mol % H<sub>2</sub>O/20 mol % DMSO at 25.0 ± 0.1 °C.

|   | [R <sub>2</sub> NH] / 10 <sup>-3</sup> M | <i>k</i> <sub>obsd</sub> / 10 <sup>-2</sup> s <sup>-1</sup> |
|---|------------------------------------------|-------------------------------------------------------------|
| 1 | 10.6                                     | 1.79                                                        |
| 2 | 20.3                                     | 4.69                                                        |
| 3 | 29.2                                     | 8.22                                                        |
| 4 | 37.3                                     | 11.3                                                        |
| 5 | 44.7                                     | 14.5                                                        |
| 7 | 51.6                                     | 18.2                                                        |
| 8 | 58.0                                     | 21.5                                                        |

Table S10 Kinetic data for the reaction of 4-nitrophenyl phenyl thionocarbonate (**6**) with morpholine in 80 mol % H<sub>2</sub>O/20 mol % DMSO at 25.0 ± 0.1 °C.

|   | [R <sub>2</sub> NH] / 10 <sup>-3</sup> M | <i>k</i> <sub>obsd</sub> / 10 <sup>-1</sup> s <sup>-1</sup> |
|---|------------------------------------------|-------------------------------------------------------------|
| 1 | 12.4                                     | 0.856                                                       |
| 2 | 20.4                                     | 1.52                                                        |
| 3 | 30.6                                     | 2.86                                                        |
| 4 | 40.8                                     | 3.94                                                        |
| 5 | 51.0                                     | 5.30                                                        |
| 6 | 61.2                                     | 6.65                                                        |
| 7 | 71.4                                     | 7.91                                                        |
| 8 | 81.6                                     | 9.07                                                        |

Table S11 Kinetic data for the reaction of 4-nitrophenyl phenyl thionocarbonate (**6**) with 1-(2-hydroxyethyl) piperazine in 80 mol % H<sub>2</sub>O/20 mol % DMSO at 25.0 ± 0.1 °C.

|   | [R <sub>2</sub> NH] / 10 <sup>-3</sup> M | <i>k</i> <sub>obsd</sub> / 10 <sup>-1</sup> s <sup>-1</sup> |
|---|------------------------------------------|-------------------------------------------------------------|
| 1 | 4.19                                     | 0.268                                                       |
| 2 | 8.82                                     | 0.615                                                       |
| 3 | 14.0                                     | 1.18                                                        |
| 4 | 20.4                                     | 1.98                                                        |
| 5 | 30.6                                     | 3.41                                                        |
| 6 | 40.8                                     | 4.49                                                        |
| 7 | 51.0                                     | 6.10                                                        |

Table S12 Kinetic data for the reaction of 4-nitrophenyl phenyl thionocarbonate (**6**) with piperazine in 80 mol % H<sub>2</sub>O/20 mol % DMSO at 25.0 ± 0.1 °C.

|   | [R <sub>2</sub> NH] / 10 <sup>-3</sup> M | <i>k</i> <sub>obsd</sub> / 10 <sup>-1</sup> s <sup>-1</sup> |
|---|------------------------------------------|-------------------------------------------------------------|
| 1 | 5.50                                     | 1.39                                                        |
| 2 | 11.0                                     | 3.04                                                        |
| 3 | 22.0                                     | 6.68                                                        |
| 4 | 33.0                                     | 11.1                                                        |
| 5 | 44.0                                     | 14.8                                                        |
| 6 | 55.0                                     | 19.5                                                        |
| 7 | 66.0                                     | 23.7                                                        |



Table S13 Kinetic data for the reaction of 4-nitrophenyl phenyl thionocarbonate (**6**) with 3-methylpiperidine in 80 mol % H<sub>2</sub>O/20 mol % DMSO at 25.0 ± 0.1 °C.

|   | [R <sub>2</sub> NH] / 10 <sup>-3</sup> M | <i>k</i> <sub>obsd</sub> / 10 <sup>-1</sup> s <sup>-1</sup> |
|---|------------------------------------------|-------------------------------------------------------------|
| 1 | 10.4                                     | 3.29                                                        |
| 2 | 20.7                                     | 6.92                                                        |
| 3 | 31.1                                     | 10.7                                                        |
| 4 | 41.4                                     | 14.6                                                        |
| 5 | 51.8                                     | 18.7                                                        |
| 6 | 62.1                                     | 23.1                                                        |
| 7 | 72.5                                     | 28.0                                                        |

Table S14 Kinetic data for the reaction of 4-nitrophenyl phenyl thionocarbonate (**6**) with piperidine in 80 mol % H<sub>2</sub>O/20 mol % DMSO at 25.0 ± 0.1 °C.

|   | [R <sub>2</sub> NH] / 10 <sup>-3</sup> M | <i>k</i> <sub>obsd</sub> / 10 <sup>-1</sup> s <sup>-1</sup> |
|---|------------------------------------------|-------------------------------------------------------------|
| 1 | 5.45                                     | 1.49                                                        |
| 2 | 10.6                                     | 2.82                                                        |
| 3 | 21.1                                     | 5.71                                                        |
| 4 | 32.7                                     | 8.91                                                        |
| 5 | 43.6                                     | 13.1                                                        |
| 6 | 54.5                                     | 16.3                                                        |
| 7 | 65.4                                     | 20.3                                                        |
| 8 | 76.3                                     | 24.4                                                        |

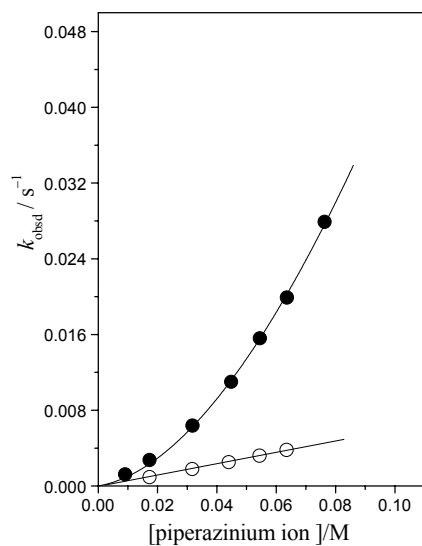

Fig. S1 Plots of  $k_{\text{obsd}}$  vs. amine concentration for reactions of 4-nitrophenyl phenyl carbonate (○) and thionocarbonate (●) with piperazinium ion in 80 mol % H<sub>2</sub>O/20 mol % DMSO at 25.0 ± 0.1 °C.

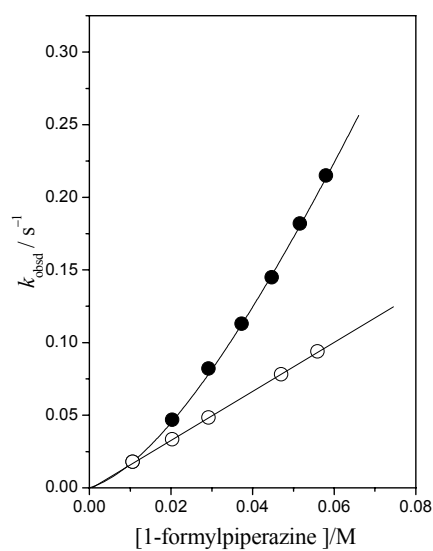

Fig. S2 Plots of  $k_{\text{obsd}}$  vs. amine concentration for reactions of 4-nitrophenyl phenyl carbonate (○) and thionocarbonate (●) with 1-formylpiperazine in 80 mol % H<sub>2</sub>O/20 mol % DMSO at 25.0 ± 0.1 °C.

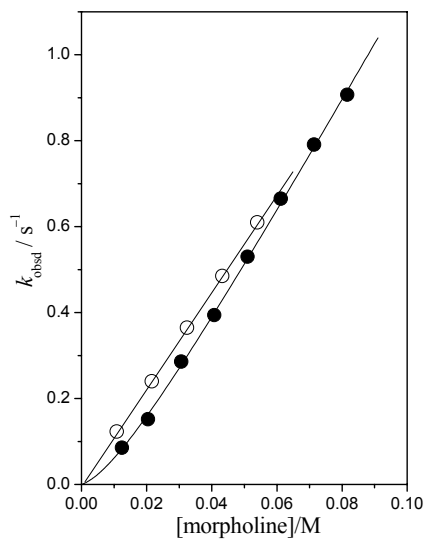

Fig. S3 Plots of  $k_{\text{obsd}}$  vs. amine concentration for reactions of 4-nitrophenyl phenyl carbonate ( $\circ$ ) and thionocarbonate ( $\bullet$ ) with morpholine in 80 mol %  $\text{H}_2\text{O}$ /20 mol % DMSO at  $25.0 \pm 0.1$  °C.

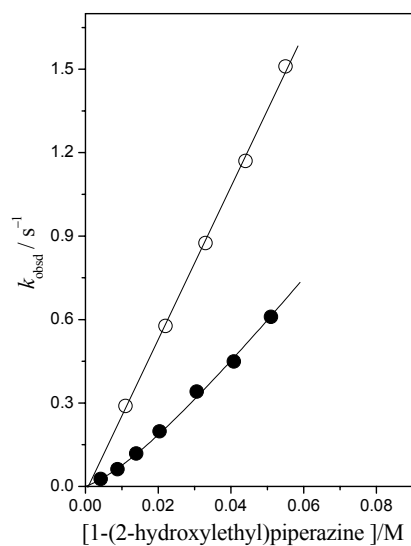

Fig. S4 Plots of  $k_{\text{obsd}}$  vs. amine concentration for reactions of 4-nitrophenyl phenyl carbonate ( $\circ$ ) and thionocarbonate ( $\bullet$ ) with 1-(2-hydroxyethyl)piperazine in 80 mol %  $\text{H}_2\text{O}$ /20 mol % DMSO at  $25.0 \pm 0.1$  °C.

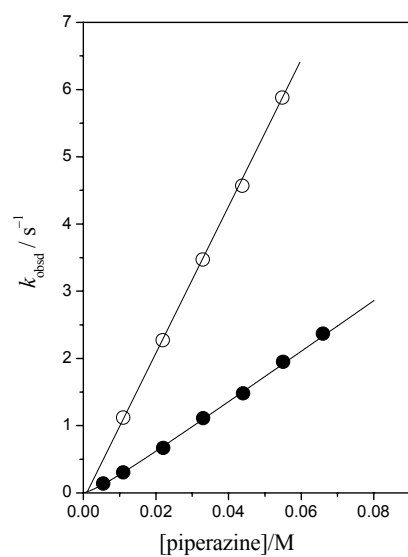

Fig. S5 Plots of  $k_{\text{obsd}}$  vs. amine concentration for reactions of 4-nitrophenyl phenyl carbonate ( $\circ$ ) and thionocarbonate ( $\bullet$ ) with piperazine in 80 mol %  $\text{H}_2\text{O}$ /20 mol % DMSO at  $25.0 \pm 0.1$  °C.

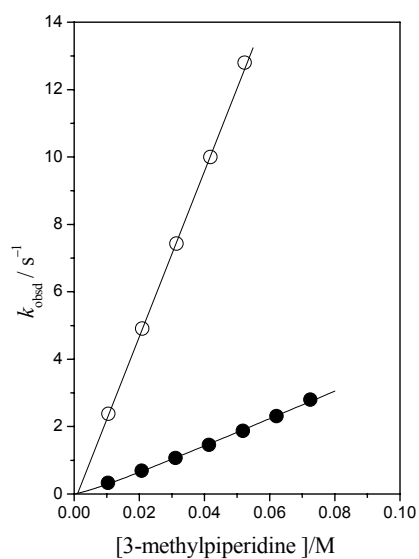

Fig. S6 Plots of  $k_{\text{obsd}}$  vs. amine concentration for reactions of 4-nitrophenyl phenyl carbonate ( $\circ$ ) and thionocarbonate ( $\bullet$ ) with 3-methylpiperidine in 80 mol %  $\text{H}_2\text{O}$ /20 mol % DMSO at  $25.0 \pm 0.1$  °C.

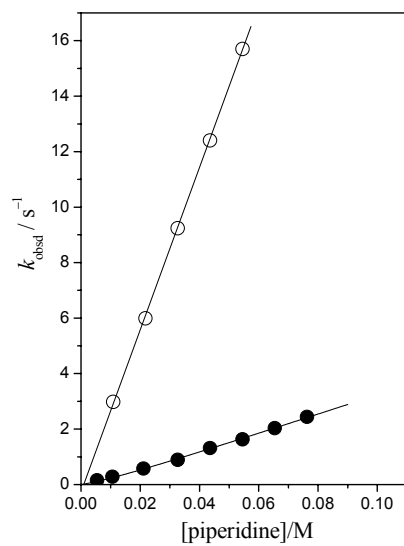

Fig. S7 Plots of  $k_{\text{obsd}}$  vs. amine concentration for reactions of 4-nitrophenyl phenyl carbonate ( $\circ$ ) and thionocarbonate ( $\bullet$ ) with piperidine in 80 mol %  $\text{H}_2\text{O}$ /20 mol % DMSO at  $25.0 \pm 0.1$  °C.

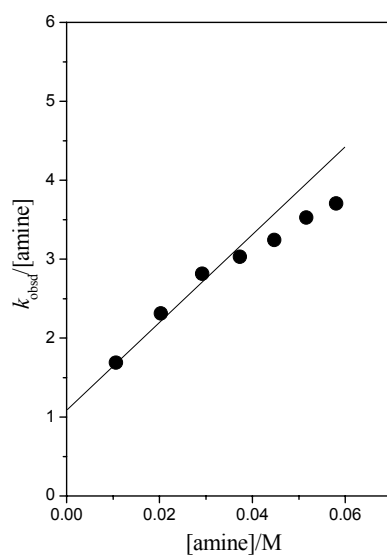

Fig. S8 Plot of  $k_{\text{obsd}}/[\text{amine}]$  vs.  $[\text{amine}]$  for the reaction of 4-nitrophenyl phenyl thionocarbonate (**6**) with 1-formylpiperazine in 80 mol %  $\text{H}_2\text{O}$ /20 mol % DMSO at  $25.0 \pm 0.1$  °C.

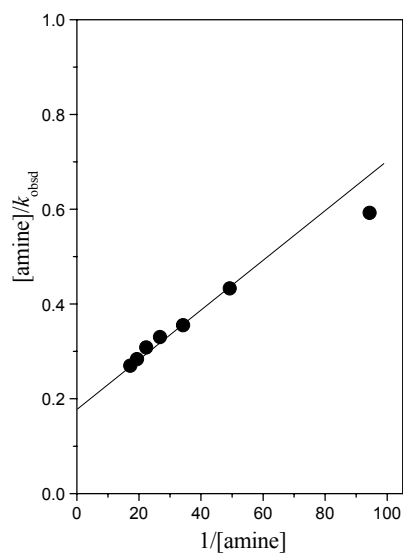

Fig. S9 Plot of  $[\text{amine}]/k_{\text{obsd}}$  vs.  $1/[\text{amine}]$  for the reaction of 4-nitrophenyl phenyl thionocarbonate (**6**) with 1-formylpiperazine in 80 mol %  $\text{H}_2\text{O}$ /20 mol % DMSO at  $25.0 \pm 0.1$  °C.

The  $k_2/k_{-1}$  ratios for the reaction of 4–nitrophenyl phenyl carbonate (**5**) and secondary amines have been determined using eqns S1 - S6.

Eqn (3) can be simplified to eqns (S1) and (S2). Then,  $\beta_1$  and  $\beta_2$  can be expressed as eqns (S3) and (S4), respectively.

$$k_N = k_1 k_2 / (k_{-1} + k_2) \quad (3)$$

$$k_N = k_1 k_2 / k_{-1}, \text{ when } k_2 \ll k_{-1} \quad (S1)$$

$$k_N = k_1, \text{ when } k_2 \gg k_{-1} \quad (S2)$$

$$\beta_1 = d(\log k_1) / d(pK_a) \quad (S3)$$

$$\begin{aligned} \beta_2 &= d(\log k_1 k_2 / k_{-1}) / d(pK_a) \\ &= \beta_1 + d(\log k_2 / k_{-1}) / d(pK_a) \end{aligned} \quad (S4)$$

Eqn (S4) can be rearranged as eqn (S5). Integral of eqn (S5) from  $pK_a^0$  results in eqn (S6). Since  $k_2 = k_{-1}$  at  $pK_a^0$ , the term  $(\log k_2 / k_{-1})_{pK_a^0}$  is zero. Therefore, one can calculate the  $k_2/k_{-1}$  ratio from eqn (S6) using  $\beta_1 = 0.26$ ,  $\beta_2 = 0.98$ ,  $pK_a^0 = 10.1$  with all the secondary amines.

$$\beta_2 - \beta_1 = d(\log k_2 / k_{-1}) / d(pK_a) \quad (S5)$$

$$(\log k_2 / k_{-1})_{pK_a} = (\beta_2 - \beta_1)(pK_a - pK_a^0) \quad (S6)$$
